# Supplementary material for: Regional brain aging: premature aging of the domain general system predicts aphasia severity
Source: PubMed Central journal article supplement (PMC11167062; doi:10.1038/s42003-024-06211-8), 2024-06-11

**Supplementary Table 1.** Demographic information of participants with aphasia

| Demographic Variables                                     | Value                    | T-Test Results                    |                                   |
|-----------------------------------------------------------|--------------------------|-----------------------------------|-----------------------------------|
|                                                           |                          | Compared to Within-Range Controls | Compared to Out-of-Range Controls |
| Stroke age, mean (SD)                                     | 56.69 (11.94)            |                                   |                                   |
| Test age, mean (SD), range                                | 60.60 (11.27), 29-80     | t = -7.082,<br>p < 0.001*         | t = 7.381,<br>p < 0.001*          |
| Education, mean (SD)                                      | 15.49 (2.28)             | t = 3.079,<br>p = 0.002*          | t = 0.229,<br>p = 0.820           |
| Sex (males:females), count<br>(percentage)                | 54:35<br>(60.67%:39.33%) | t = -4.274,<br>-p < 0.001*        | t = -6.262,<br>p < 0.001*         |
| Handedness (left:right), count<br>(percentage)            | 9:79<br>(10.23%:89.77%)  | t = 1.629,<br>p = 0.105           | t = 1.984,<br>p = 0.048*          |
| Months post-stroke, mean (SD)                             | 46.35 (47.57)            |                                   |                                   |
| Aphasia Fluency (fluent:nonfluent),<br>count (percentage) | 45:44<br>(50.56%:49.44%) |                                   |                                   |
| Western Aphasia Battery<br>Aphasia Quotient, mean (SD)    | 59.15 (22.71)            |                                   |                                   |
| Aphasia Types count (percentage)                          |                          |                                   |                                   |
| Anomic                                                    | 25 (28.09%)              |                                   |                                   |
| Broca's                                                   | 41 (46.07%)              |                                   |                                   |
| Conduction                                                | 12 (13.48%)              |                                   |                                   |
| Global                                                    | 4 (4.49%)                |                                   |                                   |
| Transcortical Motor                                       | 1 (1.12%)                |                                   |                                   |
| Wernicke's                                                | 6 (6.74%)                |                                   |                                   |

**Supplementary Table 2.** Demographic information of within-range controls ( $n = 126$ ) and out-of-range controls ( $n = 106$ ).

| <b>Within-Range Controls (<math>n = 126</math>)</b>      |                                |
|----------------------------------------------------------|--------------------------------|
| <b>Demographic Variables</b>                             | <b>Value</b>                   |
| Test age, mean (SD), range                               | 46.13 (19.93), 20-79           |
| Sex (males:females), count (percentage)                  | 37:89 (29.37%, 70.63%)         |
| Education (years)                                        | 16.37 (1.60)                   |
| Handedness (left:right:ambidextrous), count (percentage) | 8:113:5 (6.35%, 89.68%, 3.97%) |
| MoCA Score, mean (SD)                                    | 27.18 (2.43)                   |
| <b>Out-of-Range Controls (<math>n = 106</math>)</b>      |                                |
| <b>Demographic Variables</b>                             | <b>Value</b>                   |
| Test age, mean (SD)                                      | 46.80 (17.08), 20-79           |
| Sex (males:females), count (percentage)                  | 87:19 (82.08%, 17.92%)         |
| Education (years)                                        | 15.52 (2.20)                   |
| Handedness (left:right:ambidextrous), count (percentage) | 5:97:4 (4.7%, 91.51%, 3.77%)   |
| MoCA Score, mean (SD)                                    | 27.50 (2.68)                   |

**Supplementary Table 3.** Summary of the multiple linear regression analysis using left domain-general regions. Each row summarizes a separate linear regression model, with the behavioral test as the dependent variable, and BrainGAP, gray matter volume, lesion volume, age, and number of ROIs as the independent variables. Values indicate *t*-values on the top and *p*-values underneath. Significant values are indicated in **bold**.

| Behavioral Test           | BrainGAP                     | Gray Matter<br>Volume        | Lesion<br>Volume                  | Age                               | Number of ROIs |
|---------------------------|------------------------------|------------------------------|-----------------------------------|-----------------------------------|----------------|
| WAB AQ                    | <b>-2.71</b><br><b>0.008</b> | <b>-2.67</b><br><b>0.009</b> | <b>-3.43</b><br><b>&lt; 0.001</b> | <b>-3.47</b><br><b>&lt; 0.001</b> |                |
| WAB Naming                | -2.11<br>0.038               | -2.12<br>0.037               | <b>-3.23</b><br><b>&lt; 0.001</b> | <b>-3.05</b><br><b>&lt; 0.001</b> |                |
| WAB Repetition            | -2.04<br>0.045               | -2.17<br>0.033               | <b>-3.09</b><br><b>0.003</b>      | <b>-2.90</b><br><b>0.005</b>      |                |
| WAB Comprehension         | <b>-3.34</b><br><b>0.001</b> | <b>-3.38</b><br><b>0.001</b> | <b>-4.56</b><br><b>&lt; 0.001</b> | <b>-2.91</b><br><b>0.005</b>      |                |
| WAB Spontaneous<br>Speech | -2.36<br>0.021               | -2.15<br>0.034               | -2.39<br>0.019                    | <b>-3.11</b><br><b>0.003</b>      |                |



**Supplementary Figure 1.** Figures to show gray matter volume in healthy participants (upper color graph) and proportion of lesion to the corresponding ROIs in participants with aphasia (lower black and white graph). In all graphs, each line represents an individual participant. In the colored graphs, the scale shows probabilistic gray matter volume from VBM. On the black and white graphs, the scale shows the proportion of each ROI that has been lesioned. (A) shows language-specific regions, (B) shows domain-general, (C) occipital lobe, (D) parietal lobe, (E) temporal lobe, (F) frontal lobe.

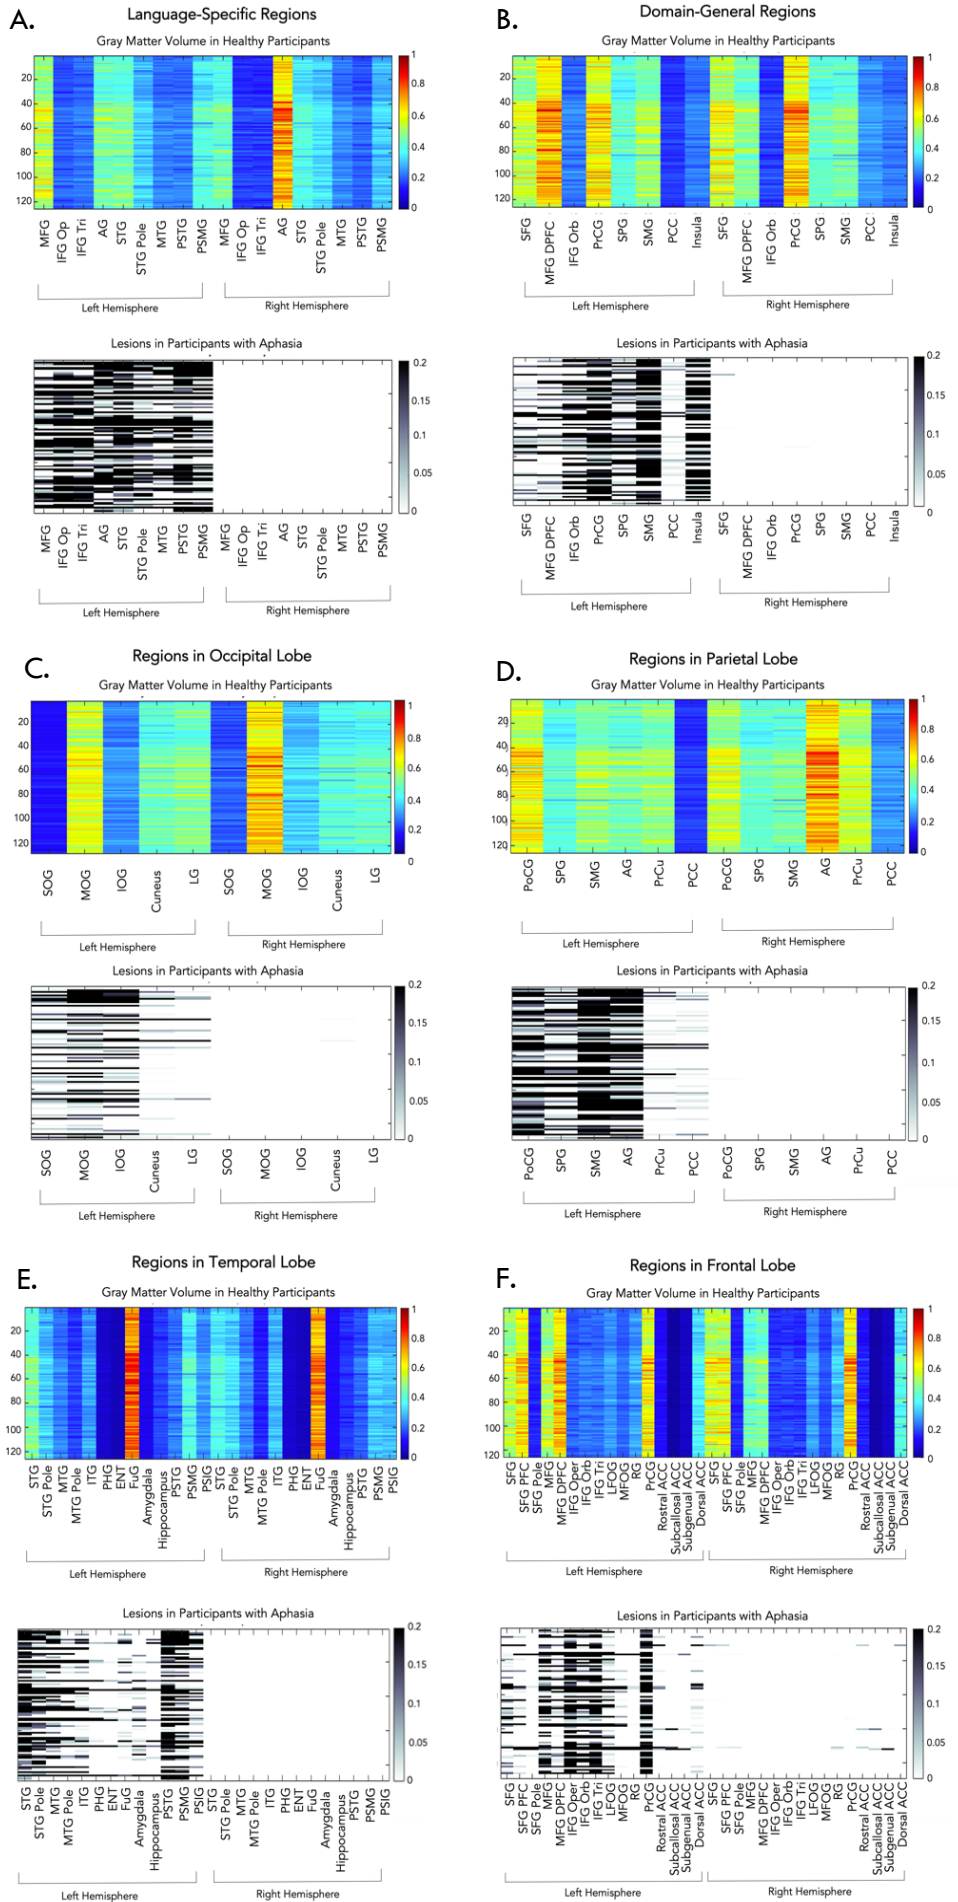

Supplement: 42003_2024_6211_MOESM1_ESM.pdf [file 42003_2024_6211_MOESM1_ESM.pdf]
