# Supplementary material for: Regional brain aging: premature aging of the domain general system predicts aphasia severity
Source: PubMed Central journal article supplement (PMC11167062; doi:10.1038/s42003-024-06211-8), 2024-06-11
Supplement: 42003_2024_6211_MOESM2_ESM.pdf [file 42003_2024_6211_MOESM2_ESM.pdf]

## Description of Additional Supplementary Files

**File name:** Supplementary Data 1

**Description:** Data which support the graphs in the manuscript, including regional brain ages, regional proportional brain ages, and regional gray matter volumes.

**File name:** Supplementary Data 2

**Description:** A breakdown of which regions of interest from the Johns Hopkins atlas were in each brain region.
